# Supplementary material
Source: HighWire-hosted journal article supplement (https://jnm.snmjournals.org/highwire/filestream/95577/field_highwire_adjunct_files/0/234013_Supplemental_Data.pdf)
Supplement: 234013_Supplemental_Data.pdf [file 234013_Supplemental_Data.pdf]

**Supplemental Table 1** – Antibody characteristics

| Antibody                | Dilution | Manufacturer / #                             | Fluorochrome        | Host / Clonality  |
|-------------------------|----------|----------------------------------------------|---------------------|-------------------|
| Anti Human Insulin      | 1:100    | Invitrogen / 53976980                        | AF 488              | Mouse monoclonal  |
| Anti Human Somatostatin | 1:100    | Boster / PA2054                              | None                | Rabbit polyclonal |
| Anti Human Glucagon     | 1:100    | Boster / MA1047                              | None                | Mouse monoclonal  |
| Anti Polypeptide Y      | 1:100    | Santa Cruz / sc-514155                       | AF 546              | Mouse Monoclonal  |
| Anti Human D3DR         | 1:200    | Santa Cruz sc-136170                         | AF 594              | Mouse Monoclonal  |
| Anti Human D3DR         | 1:200    | Santa Cruz sc-136170                         | None                | Mouse Monoclonal  |
| Anti Human D2DR         | 1:200    | Santa Cruz sc-5303                           | AF 647              | Mouse Monoclonal  |
| Anti Human D2DR         | 1:200    | Santa Cruz sc-5303                           | None                | Mouse Monoclonal  |
| Anti Rabbit IgG         | 1:2000   | Sigma Aldrich/<br>SAB4600426 /<br>SAB4600389 | CF 568 or CF<br>488 | Goat polyclonal   |
| Anti Mouse IgG          | 1:2000   | Sigma Aldrich/<br>SAB4600309 /<br>SAB4600056 | CF568 or<br>CF488   | Goat polyclonal   |

**Supplemental Table 2** Effect of scan duration ( $t_{\max}$ ) on distribution volume ( $V_T$ ) estimation and nondisplaceable binding potential ( $BP_{ND}$ ) in pancreas and spleen. Mean  $\pm$  SD of  $V_T$  and  $BP_{ND}$ .

| <b><math>^{11}\text{C}</math>-(+)-PHNO Pancreas Distribution Volume (<math>V_T</math>)</b> |                |                |                |                |
|--------------------------------------------------------------------------------------------|----------------|----------------|----------------|----------------|
| $t_{\max}$                                                                                 | 120min         | 60min          | 45min          | 30min          |
| HC (n=6)                                                                                   | 25.4 $\pm$ 3.1 | 25.5 $\pm$ 3.4 | 25.6 $\pm$ 3.6 | 26.1 $\pm$ 4.1 |
| T1DM (n=5)                                                                                 | 22.7 $\pm$ 6.2 | 22.9 $\pm$ 6.6 | 22.9 $\pm$ 6.8 | 22.9 $\pm$ 7.3 |
| HC COV (%)                                                                                 | 12.1           | 13.4           | 14.2           | 15.8           |
| <b><math>^{11}\text{C}</math>-(+)-PHNO Spleen Distribution Volume (<math>V_T</math>)</b>   |                |                |                |                |
| $t_{\max}$                                                                                 | 120min         | 60min          | 45min          | 30min          |
| HC (n=6)                                                                                   | 5.9 $\pm$ 0.8  | 5.9 $\pm$ 0.8  | 5.9 $\pm$ 0.8  | 5.9 $\pm$ 0.8  |
| T1DM (n=5)                                                                                 | 5.9 $\pm$ 1.1  | 5.9 $\pm$ 1.1  | 5.9 $\pm$ 1.1  | 5.9 $\pm$ 1.1  |
| HC COV (%)                                                                                 | 13.2           | 13.2           | 13.3           | 13.4           |
| <b><math>^{11}\text{C}</math>-PHNO Pancreas Binding Potential (<math>BP_{ND}</math>)</b>   |                |                |                |                |
| $t_{\max}$                                                                                 | 120min         | 60min          | 45min          | 30min          |
| HC (n=6)                                                                                   | 3.3 $\pm$ 0.7  | 3.4 $\pm$ 0.7  | 3.4 $\pm$ 0.7  | 3.5 $\pm$ 0.7  |
| T1DM (n=5)                                                                                 | 2.9 $\pm$ 1.0  | 2.9 $\pm$ 1.0  | 2.9 $\pm$ 1.0  | 2.9 $\pm$ 1.0  |
| HC COV (%)                                                                                 | 20.1           | 20.7           | 21.0           | 20.5           |

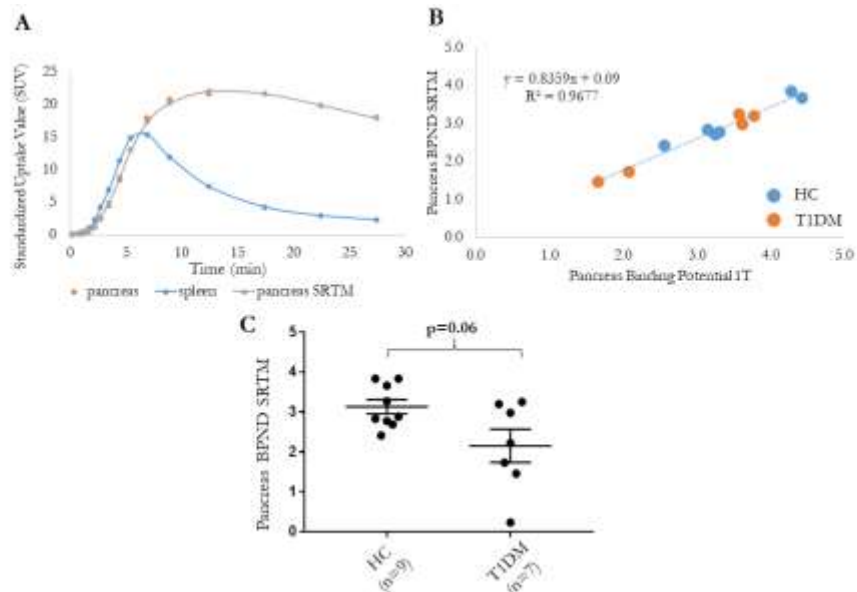

**Supplemental Figure 1 A)** Representative Pancreas and Spleen simplified reference tissue model (SRTM) fits for  $t_{\max}$  30min **B)** Correlation of 1TC model ( $t_{\max}$  30min) pancreas  $BP_{ND}$  values with pancreas  $BP_{ND}$  SRTM ( $t_{\max}$  30min) with spleen as reference region (HC – blue dots, T1DM – orange dots) **C)** Dot plot of SRTM Pancreas  $BP_{ND}$  ( $t_{\max}$  30min). Mean  $\pm$  SEM

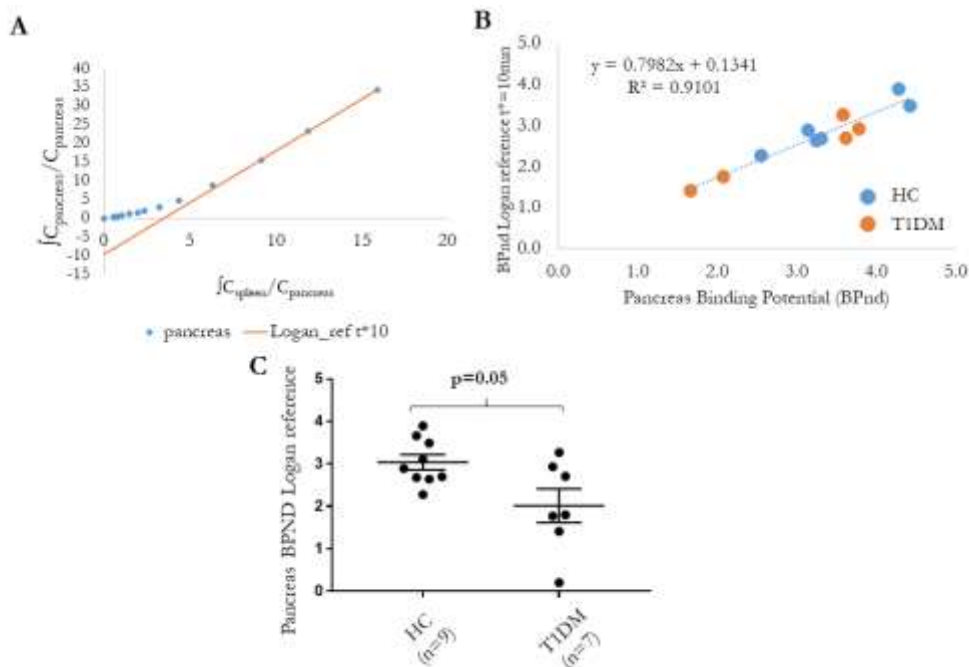

**Supplemental Figure 2 A)** Representative Logan reference fit for  $t_{\max}$  30min and  $t^*$  10min **B)** Correlation of 1TC model ( $t_{\max}$  30min) pancreas non displaceable binding potential  $BP_{ND}$  values with Pancreas  $BP_{ND}$  Logan graphical analysis reference region model ( $t_{\max}$  30min and  $t^*$  10min) with spleen as reference region (HC – blue dots, T1DM – orange dots) **C)** Dot plot of Logan graphical analysis reference region model pancreas  $BP_{ND}$  ( $t_{\max}$  30min and  $t^*$  10min). Mean  $\pm$  SEM

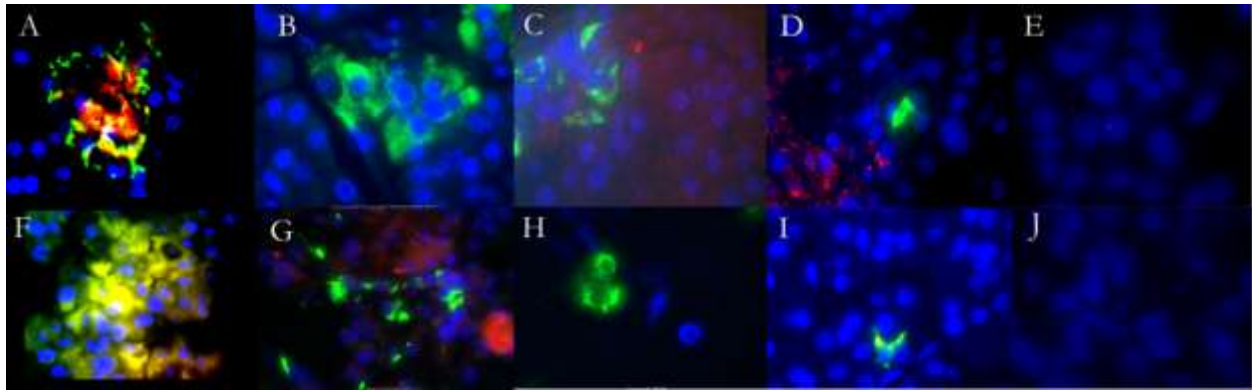

**Supplemental Figure 3** Immunohistochemistry co-localization of dopamine-3 receptor (DRD3) (**A-D**) and dopamine-2 receptor (DRD2) (**F-I**) with insulin, somatostatin, glucagon and polypeptide Y. DAPI stain (blue) indicates cell nuclei. **A**) DRD3 (red) and insulin (green) in HC **B**) DRD3 (red) and somatostatin (green) in HC **C**) DRD3 (red) and glucagon (green) in HC **D**) DRD3 (red) and polypeptide Y (green) in HC **E**) T1DM subject with DRD3 (red) and insulin (green). **F**) DRD2 (red) and insulin (green) in HC **G**) DRD2 (red) and somatostatin (green) in HC **H**) DRD2 (red) and glucagon (green) in HC **I**) DRD2 (red) and polypeptide Y (green) in HC **J**) T1DM subject with DRD2 (red) and insulin (green).
